# Supplementary material
Source: PubMed Central journal article supplement (PMC4484853)
Supplement: NIHMS692214-supplement-1.pdf [file NIHMS692214-supplement-1.pdf]

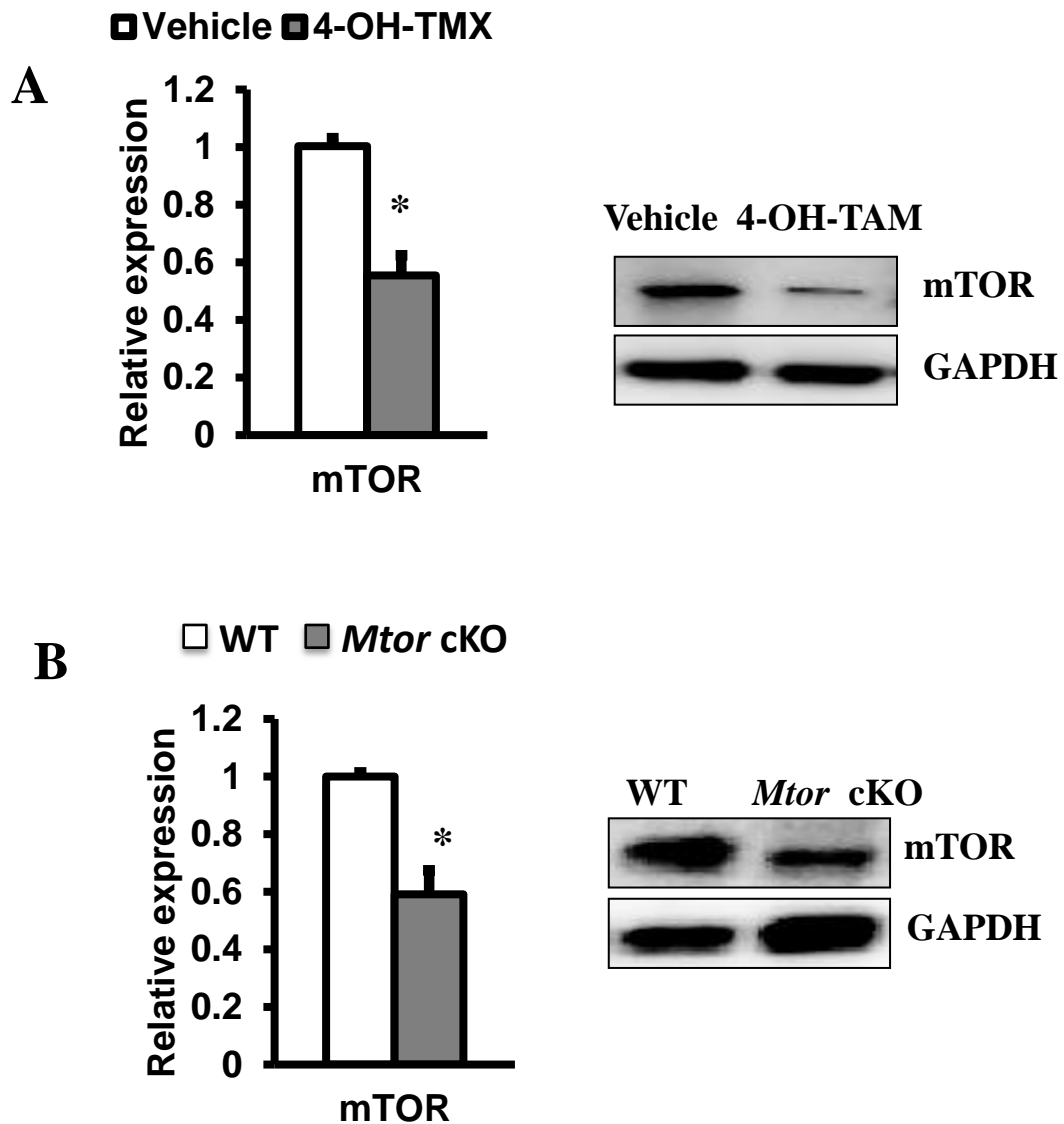

**Supplementary Figure S1. *Pax7*<sup>CreER</sup> mediated deletion of *Mtor*.** RNA and protein was extracted from myoblasts of *Mtor* cKO mice after 4-OH-TMX or vehicle treatment. Relative levels of mRNA (A) and protein (B) expression of mTOR was analyzed. N = 4. After tamoxifen induction (5 days) and chasing (5 days), injured TA muscle (5 dpi) from *Mtor* cKO and WT mice were analyzed for the relative expression of mTOR at mRNA (C) and protein (D) levels. N = 4. \*  $p < 0.05$ .
